# Supplementary figures and images for: Communicating Complex STEM Program Evaluation to Diverse Stakeholders
Source: Atypon-hosted journal article supplement (doi:10.1187/cbe.19-06-0108), 2020-05-26

# Supplemental Material

*CBE—Life Sciences Education*

Reeves *et al.*

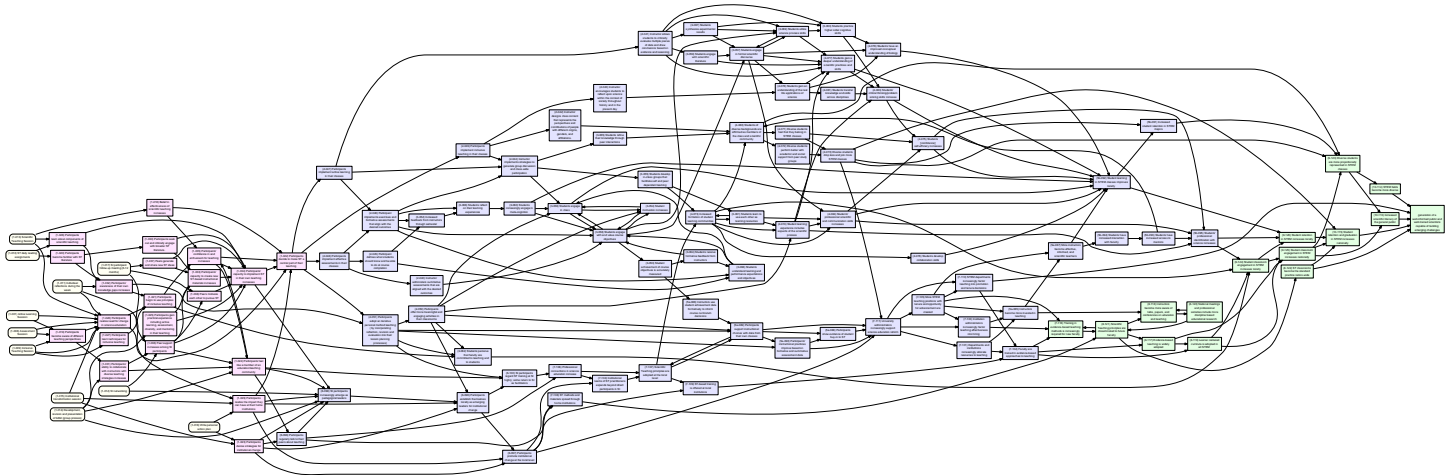

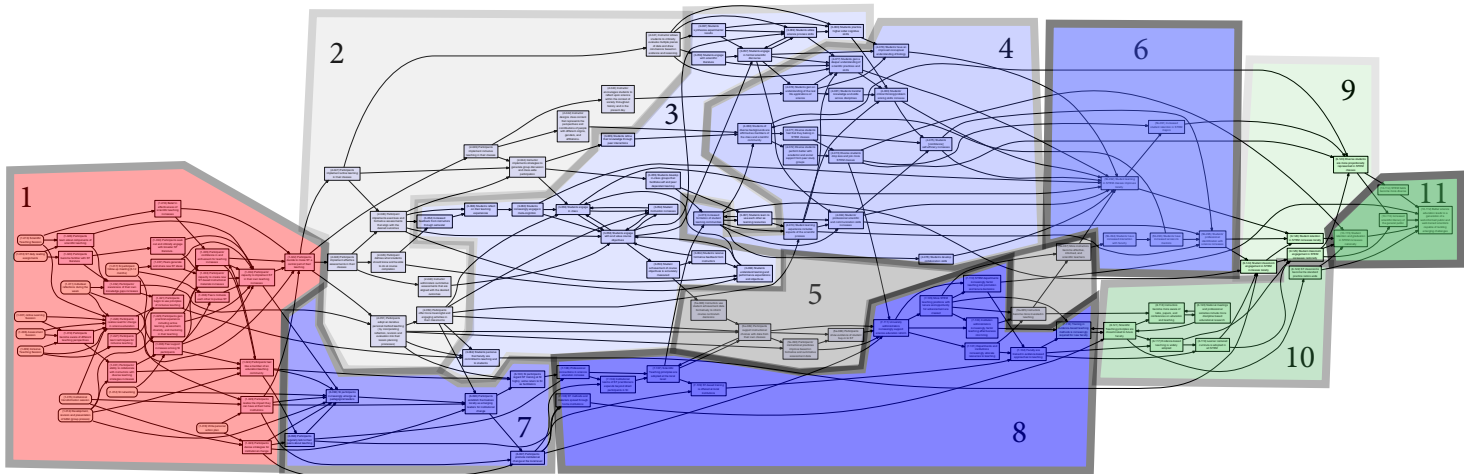

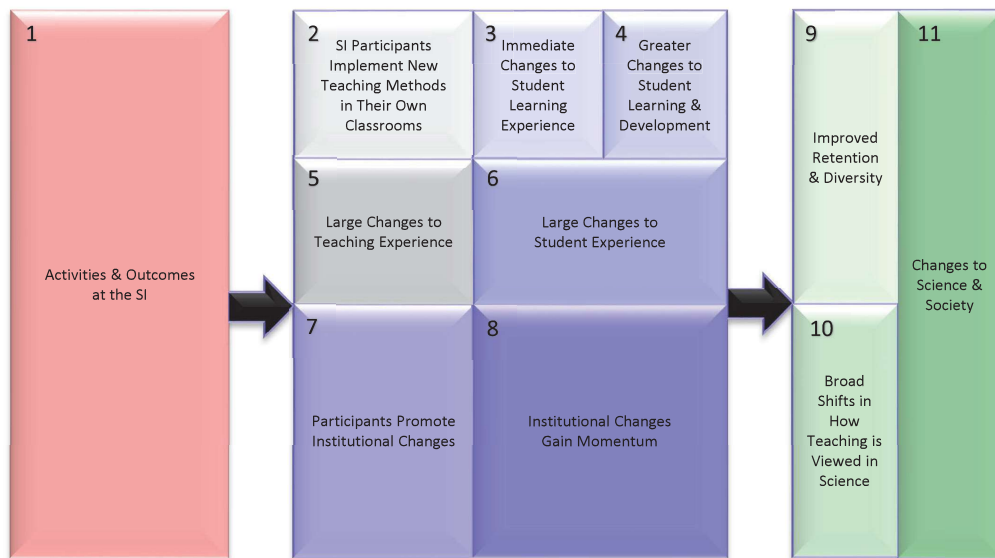

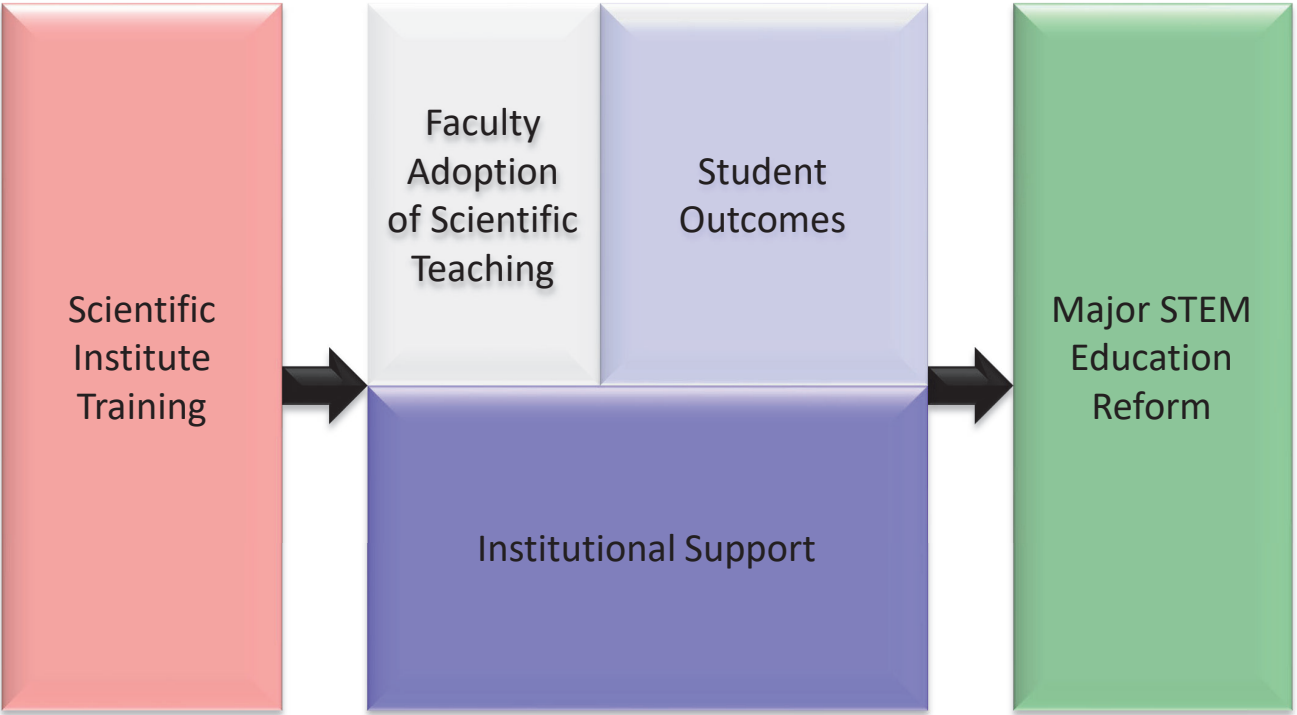

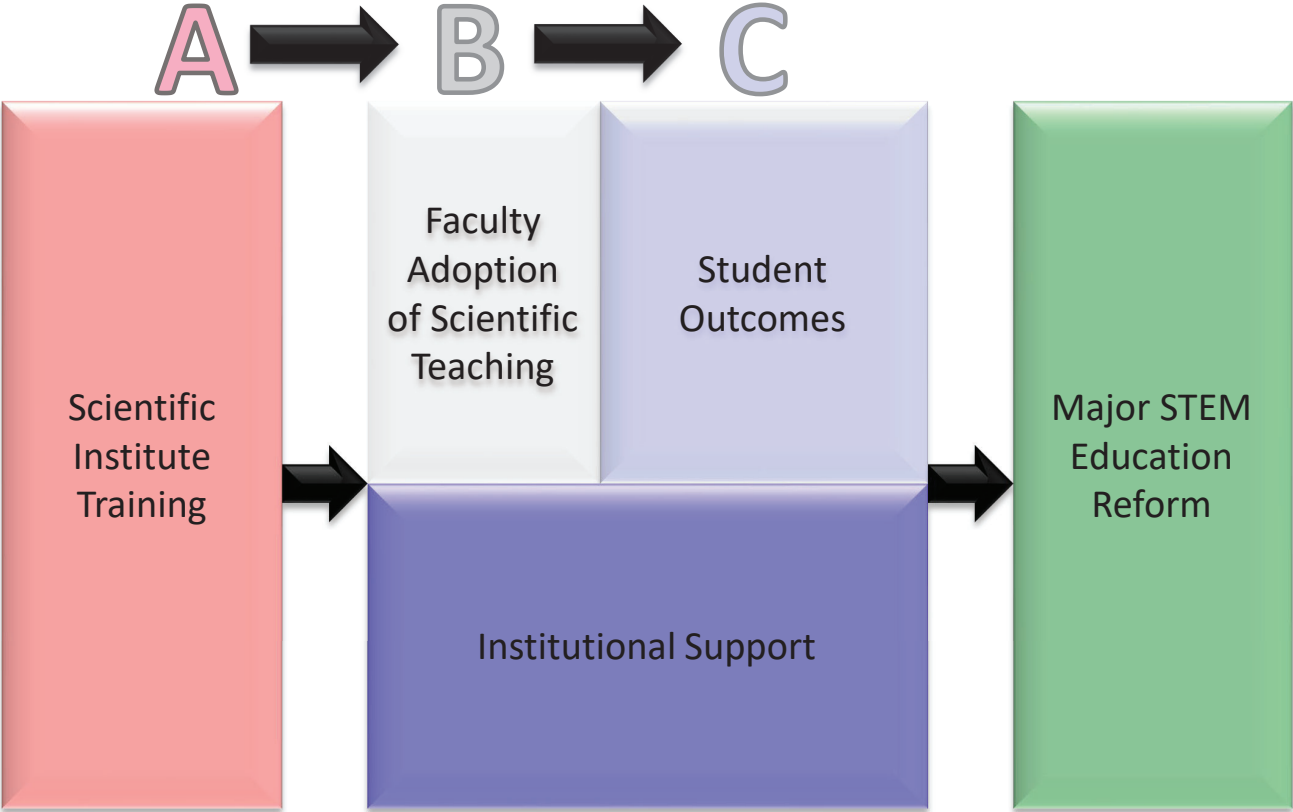

Supplement: combinedsupmats.pdf [file combinedsupmats.pdf]
